# Supplementary material for: NiftyPAD - Novel Python Package for Quantitative Analysis of Dynamic PET Data
Source: Springer Nature journal article supplement (doi:10.1007/s12021-022-09616-0), 2023-01-09
Supplement: MOESM1 [file 23905054]

## Supplementary materials

Table 1 gives demographics of the eight subjects used in Sec. 3.2.

**Table 1** Demographics of the eight subjects. FBB=[ $^{18}\text{F}$ ]florbetaben, FMM=[ $^{18}\text{F}$ ]flutemetamol, FBP=[ $^{18}\text{F}$ ]florbetapir, CU=Cognitively Unimpaired. MMSE=Mini-Mental State Examination, A=Philips Ingenuity TF PET/MR, B=Siemens ECAT EXACT HR+ scanner, C=Philips Ingenuity TF PET/CT

| Subject | Tracer | Diagnosis   | Age | Sex | Visual read | MMSE | Scanner |
|---------|--------|-------------|-----|-----|-------------|------|---------|
| 1       | FBB    | CU          | 66  | F   | 1           | 28   | A       |
| 2       | FBB    | CU          | 68  | F   | 0           | 30   | A       |
| 3       | FMM    | CU          | 80  | M   | 0           | 27   | A       |
| 4       | FMM    | CU          | 69  | F   | 1           | 30   | A       |
| 5       | PiB    | AD dementia | 60  | M   | 1           | 21   | B       |
| 6       | PiB    | CU          | 68  | M   | 0           | 30   | B       |
| 7       | FBP    | CU          | 63  | M   | 0           | 29   | C       |
| 8       | FBP    | AD dementia | 71  | M   | 1           | 25   | C       |
